# Supplementary material
Source: ML conference proceedings conference paper supplement (https://openreview.net/forum?id=IkDz6wxeTG)
Supplement: supplementary_material [file 0415.xlsx]

## Sheet: sheet1
7位医生原始标注椭圆参数
User	Image_Name	Disc	Cup
user1	0415.jpg	{"angle":90.0,"centerX":434.70566037735847,"centerY":747.3546037735848,"height":234.30943396226414,"typeName":"disc","width":197.3132075471698}	{"angle":90.0,"centerX":436.83294339622637,"centerY":747.632075471698,"height":132.56981132075472,"typeName":"cup","width":117.15471698113207}
user2	0415.jpg	{"angle":90.0,"centerX":439.70015094339624,"centerY":749.7901886792453,"height":221.97735849056605,"typeName":"disc","width":206.56226415094338}	{"angle":95.75999999999996,"centerX":444.945790360075,"centerY":763.8758442491467,"height":92.49056603773585,"typeName":"cup","width":77.0754716981132}
user3	0415.jpg	{"angle":90.0,"centerX":440.8716981132075,"centerY":748.2486792452829,"height":240.47547169811318,"typeName":"disc","width":203.47924528301888}	{"angle":90.0,"centerX":448.9183773584906,"centerY":752.2566037735849,"height":80.15849056603773,"typeName":"cup","width":86.3245283018868}
user4	0415.jpg	{"angle":90.0,"centerX":437.1720754716981,"centerY":745.4739622641509,"height":212.72830188679245,"typeName":"disc","width":194.23018867924526}	{"angle":90.0,"centerX":444.87962264150946,"centerY":750.0984905660378,"height":67.82641509433962,"typeName":"cup","width":67.82641509433962}
user5	0415.jpg	{"angle":90.0,"centerX":438.6210943396226,"centerY":744.8265283018868,"height":218.8943396226415,"typeName":"disc","width":181.89811320754714}	{"angle":90.0,"centerX":436.24716981132076,"centerY":747.6012452830188,"height":83.24150943396226,"typeName":"cup","width":83.24150943396226}
user6	0415.jpg	{"angle":90.0,"centerX":437.788679245283,"centerY":749.1735849056604,"height":234.30943396226414,"typeName":"disc","width":191.14716981132074}	{"angle":90.0,"centerX":442.4132075471698,"centerY":753.7981132075471,"height":83.24150943396226,"typeName":"cup","width":83.24150943396226}
user7	0415.jpg	{"angle":90.0,"centerX":437.3262264150943,"centerY":743.6241509433961,"height":228.1433962264151,"typeName":"disc","width":203.47924528301888}	{"angle":115.07999999999997,"centerX":441.6385531964289,"centerY":749.2593996104123,"height":67.82641509433962,"typeName":"cup","width":55.49433962264151}
