# Supplementary material
Source: ML conference proceedings conference paper supplement (https://openreview.net/forum?id=IkDz6wxeTG)
Supplement: supplementary_material [file 0500.xlsx]

## Sheet: sheet1
7位医生原始标注椭圆参数
User	Image_Name	Disc	Cup
user1	0500.jpg	{"angle":90.0,"centerX":284.0519622641509,"centerY":804.6679245283018,"height":246.64150943396228,"typeName":"disc","width":231.2264150943396}	{"angle":90.0,"centerX":279.42743396226433,"centerY":804.6679245283018,"height":147.98490566037734,"typeName":"cup","width":141.8188679245283}
user2	0500.jpg	{"angle":90.0,"centerX":290.1563396226418,"centerY":806.1477735849056,"height":265.13962264150945,"typeName":"disc","width":228.1433962264151}	{"angle":81.3400000000001,"centerX":285.48590496071233,"centerY":796.1972213882776,"height":104.82264150943396,"typeName":"cup","width":67.82641509433962}
user3	0500.jpg	{"angle":90.0,"centerX":275.5428301886793,"centerY":797.8544528301886,"height":280.55471698113206,"typeName":"disc","width":215.81132075471695}	{"angle":90.0,"centerX":273.41554716981136,"centerY":787.2796981132076,"height":101.73962264150944,"typeName":"cup","width":86.3245283018868}
user4	0500.jpg	{"angle":90.0,"centerX":296.0449056603775,"centerY":810.2173584905661,"height":268.2226415094339,"typeName":"disc","width":221.97735849056605}	{"angle":90.0,"centerX":286.79584905660386,"centerY":802.5098113207547,"height":86.3245283018868,"typeName":"cup","width":86.3245283018868}
user5	0500.jpg	{"angle":90.0,"centerX":273.5696981132078,"centerY":801.0299622641509,"height":231.2264150943396,"typeName":"disc","width":194.23018867924526}	{"angle":90.0,"centerX":273.50803773584903,"centerY":789.2836603773584,"height":104.82264150943396,"typeName":"cup","width":104.82264150943396}
user6	0500.jpg	{"angle":90.0,"centerX":284.63773584905675,"centerY":804.6679245283018,"height":258.97358490566035,"typeName":"disc","width":221.97735849056605}	{"angle":90.0,"centerX":281.55471698113206,"centerY":798.5018867924528,"height":104.82264150943396,"typeName":"cup","width":104.82264150943396}
user7	0500.jpg	{"angle":112.38000000000001,"centerX":283.28431865350376,"centerY":792.7728378896152,"height":246.64150943396228,"typeName":"disc","width":209.64528301886793}	{"angle":63.96999999999997,"centerX":280.89490895765675,"centerY":791.4419459111955,"height":86.3245283018868,"typeName":"cup","width":52.41132075471698}
