# Supplementary material
Source: ML conference proceedings conference paper supplement (https://openreview.net/forum?id=IkDz6wxeTG)
Supplement: supplementary_material [file 0505.xlsx]

## Sheet: sheet1
7位医生原始标注椭圆参数
User	Image_Name	Disc	Cup
user1	0505.jpg	{"angle":100.95,"centerX":444.6732827199536,"centerY":762.1138909044375,"height":271.3056603773585,"typeName":"disc","width":209.64528301886793}	{"angle":113.96999999999997,"centerX":440.66727273204464,"centerY":767.1064443473537,"height":172.6490566037736,"typeName":"cup","width":129.48679245283017}
user2	0505.jpg	{"angle":90.0,"centerX":450.1207547169811,"centerY":776.920754716981,"height":308.3018867924528,"typeName":"disc","width":203.47924528301888}	{"angle":90.0,"centerX":461.2504528301887,"centerY":763.0471698113207,"height":120.23773584905659,"typeName":"cup","width":86.3245283018868}
user3	0505.jpg	{"angle":90.0,"centerX":445.4962264150943,"centerY":773.8377358490566,"height":289.8037735849056,"typeName":"disc","width":218.8943396226415}	{"angle":90.0,"centerX":454.7452830188679,"centerY":771.8646037735849,"height":141.8188679245283,"typeName":"cup","width":144.9018867924528}
user4	0505.jpg	{"angle":90.0,"centerX":449.50415094339616,"centerY":774.7626415094339,"height":268.2226415094339,"typeName":"disc","width":203.47924528301888}	{"angle":90.0,"centerX":484.9588679245283,"centerY":768.596603773585,"height":129.48679245283017,"typeName":"cup","width":129.48679245283017}
user5	0505.jpg	{"angle":90.0,"centerX":439.45350943396227,"centerY":760.3341132075471,"height":240.47547169811318,"typeName":"disc","width":191.14716981132074}	{"angle":90.0,"centerX":451.56977358490565,"centerY":752.3799245283018,"height":123.32075471698114,"typeName":"cup","width":98.6566037735849}
user6	0505.jpg	{"angle":90.0,"centerX":447.0377358490566,"centerY":766.1301886792453,"height":274.388679245283,"typeName":"disc","width":215.81132075471695}	{"angle":90.0,"centerX":459.3698113207547,"centerY":758.4226415094339,"height":123.32075471698114,"typeName":"cup","width":123.32075471698114}
user7	0505.jpg	{"angle":96.77999999999999,"centerX":442.9826419149713,"centerY":762.4558185028022,"height":271.3056603773585,"typeName":"disc","width":203.47924528301888}	{"angle":90.0,"centerX":460.91132075471694,"centerY":762.5230566037736,"height":120.23773584905659,"typeName":"cup","width":83.24150943396226}
