# Supplementary material
Source: ML conference proceedings conference paper supplement (https://openreview.net/forum?id=IkDz6wxeTG)
Supplement: supplementary_material [file 0542.xlsx]

## Sheet: sheet1
7位医生原始标注椭圆参数
User	Image_Name	Disc	Cup
user1	0542.jpg	{"angle":90.0,"centerX":452.24803773584904,"centerY":872.4943396226414,"height":203.47924528301888,"typeName":"disc","width":191.14716981132074}	{"angle":90.0,"centerX":442.9989811320754,"centerY":874.0358490566036,"height":126.40377358490565,"typeName":"cup","width":123.32075471698114}
user2	0542.jpg	{"angle":90.0,"centerX":446.5136226415094,"centerY":875.577358490566,"height":258.97358490566035,"typeName":"disc","width":212.72830188679245}	{"angle":79.16999999999999,"centerX":460.1804708996642,"centerY":884.3920102672441,"height":89.40754716981131,"typeName":"cup","width":80.15849056603773}
user3	0542.jpg	{"angle":90.0,"centerX":454.7452830188679,"centerY":873.7583773584905,"height":265.13962264150945,"typeName":"disc","width":218.8943396226415}	{"angle":90.0,"centerX":447.0377358490566,"centerY":872.2168679245283,"height":101.73962264150944,"typeName":"cup","width":98.6566037735849}
user4	0542.jpg	{"angle":90.0,"centerX":431.006037735849,"centerY":864.1701886792453,"height":218.8943396226415,"typeName":"disc","width":209.64528301886793}	{"angle":90.0,"centerX":449.50415094339627,"centerY":878.0437735849056,"height":70.90943396226415,"typeName":"cup","width":70.90943396226415}
user5	0542.jpg	{"angle":90.0,"centerX":440.9950188679245,"centerY":872.1552075471698,"height":212.72830188679245,"typeName":"disc","width":194.23018867924526}	{"angle":90.0,"centerX":449.78162264150933,"centerY":881.5584150943396,"height":80.15849056603773,"typeName":"cup","width":80.15849056603773}
user6	0542.jpg	{"angle":90.0,"centerX":430.08113207547166,"centerY":883.2849056603773,"height":206.56226415094338,"typeName":"disc","width":163.39999999999998}	{"angle":90.0,"centerX":445.4962264150943,"centerY":886.3679245283018,"height":89.40754716981131,"typeName":"cup","width":89.40754716981131}
user7	0542.jpg	{"angle":90.0,"centerX":443.9238867924528,"centerY":877.9512830188679,"height":231.2264150943396,"typeName":"disc","width":194.23018867924526}	{"angle":74.47999999999996,"centerX":457.06394149067626,"centerY":883.0198354107495,"height":80.15849056603773,"typeName":"cup","width":58.577358490566034}
