# Supplementary material
Source: ML conference proceedings conference paper supplement (https://openreview.net/forum?id=IkDz6wxeTG)
Supplement: supplementary_material [file 0614.xlsx]

## Sheet: sheet1
7位医生原始标注椭圆参数
User	Image_Name	Disc	Cup
user1	0614.jpg	{"angle":90.0,"centerX":485.9896981132076,"centerY":798.5018867924528,"height":240.47547169811318,"typeName":"disc","width":197.3132075471698}	{"angle":90.0,"centerX":485.9896981132076,"centerY":800.043396226415,"height":138.73584905660377,"typeName":"cup","width":129.48679245283017}
user2	0614.jpg	{"angle":90.0,"centerX":489.3193584905662,"centerY":792.3358490566038,"height":265.13962264150945,"typeName":"disc","width":184.9811320754717}	{"angle":77.3900000000001,"centerX":498.1288188385579,"centerY":794.5601164997704,"height":117.15471698113207,"typeName":"cup","width":73.99245283018867}
user3	0614.jpg	{"angle":90.0,"centerX":489.6584905660379,"centerY":798.2244150943396,"height":255.89056603773582,"typeName":"disc","width":194.23018867924526}	{"angle":90.0,"centerX":486.85294339622624,"centerY":788.112113207547,"height":114.07169811320755,"typeName":"cup","width":114.07169811320755}
user4	0614.jpg	{"angle":90.0,"centerX":481.61181132075467,"centerY":792.3358490566038,"height":252.8075471698113,"typeName":"disc","width":188.0641509433962}	{"angle":90.0,"centerX":493.35811320754715,"centerY":791.7192452830188,"height":101.73962264150944,"typeName":"cup","width":80.15849056603773}
user5	0614.jpg	{"angle":90.0,"centerX":484.4481886792453,"centerY":791.4726037735849,"height":234.30943396226414,"typeName":"disc","width":181.89811320754714}	{"angle":90.0,"centerX":489.6893207547171,"centerY":788.9445283018869,"height":107.90566037735847,"typeName":"cup","width":92.49056603773585}
user6	0614.jpg	{"angle":90.0,"centerX":483.153320754717,"centerY":790.7943396226415,"height":231.2264150943396,"typeName":"disc","width":178.81509433962262}	{"angle":90.0,"centerX":487.7778490566038,"centerY":787.711320754717,"height":107.90566037735847,"typeName":"cup","width":83.24150943396226}
user7	0614.jpg	{"angle":79.91000000000003,"centerX":482.4607876916814,"centerY":793.7819625900341,"height":258.97358490566035,"typeName":"disc","width":194.23018867924526}	{"angle":76.84000000000009,"centerX":488.20016551648405,"centerY":790.824396198154,"height":89.40754716981131,"typeName":"cup","width":64.74339622641509}
