# Supplementary material
Source: ML conference proceedings conference paper supplement (https://openreview.net/forum?id=IkDz6wxeTG)
Supplement: supplementary_material [file 0653.xlsx]

## Sheet: sheet1
7位医生原始标注椭圆参数
User	Image_Name	Disc	Cup
user1	0653.jpg	{"angle":103.32999999999998,"centerX":358.00508216299465,"centerY":712.9543435200848,"height":243.55849056603773,"typeName":"disc","width":178.81509433962262}	{"angle":105.25000000000001,"centerX":353.06171491327234,"centerY":703.3045416220839,"height":132.56981132075472,"typeName":"cup","width":120.23773584905659}
user2	0653.jpg	{"angle":90.0,"centerX":377.577320754717,"centerY":722.9679245283019,"height":274.388679245283,"typeName":"disc","width":234.30943396226414}	{"angle":103.88999999999999,"centerX":394.53958989442356,"centerY":704.9465927495905,"height":110.98867924528302,"typeName":"cup","width":104.82264150943396}
user3	0653.jpg	{"angle":90.0,"centerX":362.2547169811321,"centerY":726.0509433962263,"height":262.05660377358487,"typeName":"disc","width":194.23018867924526}	{"angle":90.0,"centerX":368.4207547169811,"centerY":704.4698113207546,"height":101.73962264150944,"typeName":"cup","width":114.07169811320755}
user4	0653.jpg	{"angle":90.0,"centerX":355.4720754716981,"centerY":719.2683018867924,"height":246.64150943396228,"typeName":"disc","width":184.9811320754717}	{"angle":90.0,"centerX":387.84377358490565,"centerY":708.4777358490566,"height":92.49056603773585,"typeName":"cup","width":92.49056603773585}
user5	0653.jpg	{"angle":90.0,"centerX":358.9558867924528,"centerY":718.7750188679245,"height":252.8075471698113,"typeName":"disc","width":184.9811320754717}	{"angle":90.0,"centerX":368.2049433962264,"centerY":704.254,"height":80.15849056603773,"typeName":"cup","width":80.15849056603773}
user6	0653.jpg	{"angle":113.17999999999998,"centerX":358.82254725135437,"centerY":701.2451312917221,"height":228.1433962264151,"typeName":"disc","width":163.39999999999998}	{"angle":119.62000000000006,"centerX":387.3010293176787,"centerY":706.0255350438515,"height":89.40754716981131,"typeName":"cup","width":86.3245283018868}
user7	0653.jpg	{"angle":94.69,"centerX":379.04269089158004,"centerY":718.7694328751588,"height":258.97358490566035,"typeName":"disc","width":240.47547169811318}	{"angle":90.0,"centerX":363.17962264150935,"centerY":708.4777358490566,"height":58.577358490566034,"typeName":"cup","width":58.577358490566034}
