# Supplementary material
Source: ML conference proceedings conference paper supplement (https://openreview.net/forum?id=IkDz6wxeTG)
Supplement: supplementary_material [file 0726.xlsx]

## Sheet: sheet1
7位医生原始标注椭圆参数
User	Image_Name	Disc	Cup
user1	0726.jpg	{"angle":102.0,"centerX":383.5800638979659,"centerY":768.5571738098985,"height":246.64150943396228,"typeName":"disc","width":188.0641509433962}	{"angle":105.22999999999999,"centerX":391.20161805263245,"centerY":781.2099778730363,"height":144.9018867924528,"typeName":"cup","width":129.48679245283017}
user2	0726.jpg	{"angle":95.82999999999997,"centerX":405.67823728315443,"centerY":766.1709063461566,"height":292.8867924528302,"typeName":"disc","width":191.14716981132074}	{"angle":102.19000000000001,"centerX":425.34989684550294,"centerY":790.3066707983926,"height":101.73962264150944,"typeName":"cup","width":73.99245283018867}
user3	0726.jpg	{"angle":90.0,"centerX":394.62641509433956,"centerY":770.7547169811321,"height":265.13962264150945,"typeName":"disc","width":203.47924528301888}	{"angle":90.0,"centerX":400.79245283018867,"centerY":786.1698113207547,"height":110.98867924528302,"typeName":"cup","width":110.98867924528302}
user4	0726.jpg	{"angle":90.0,"centerX":397.0928301886792,"centerY":787.094716981132,"height":274.388679245283,"typeName":"disc","width":191.14716981132074}	{"angle":90.0,"centerX":420.2154716981132,"centerY":793.2607547169812,"height":86.3245283018868,"typeName":"cup","width":86.3245283018868}
user5	0726.jpg	{"angle":90.0,"centerX":391.2967547169811,"centerY":765.6677358490566,"height":255.89056603773582,"typeName":"disc","width":184.9811320754717}	{"angle":90.0,"centerX":402.2106415094339,"centerY":775.6258867924529,"height":73.99245283018867,"typeName":"cup","width":73.99245283018867}
user6	0726.jpg	{"angle":90.0,"centerX":398.0485660377358,"centerY":767.6716981132075,"height":234.30943396226414,"typeName":"disc","width":175.7320754716981}	{"angle":90.0,"centerX":425.4566037735849,"centerY":772.2962264150943,"height":77.0754716981132,"typeName":"cup","width":92.49056603773585}
user7	0726.jpg	{"angle":90.0,"centerX":390.40267924528297,"centerY":767.5483773584906,"height":274.388679245283,"typeName":"disc","width":197.3132075471698}	{"angle":90.0,"centerX":440.8716981132076,"centerY":774.2385283018867,"height":64.74339622641509,"typeName":"cup","width":64.74339622641509}
