# Supplementary material
Source: ML conference proceedings conference paper supplement (https://openreview.net/forum?id=IkDz6wxeTG)
Supplement: supplementary_material [file 0766.xlsx]

## Sheet: sheet1
7位医生原始标注椭圆参数
User	Image_Name	Disc	Cup
user1	0766.jpg	{"angle":92.75999999999998,"centerX":256.4244420179507,"centerY":804.760707351635,"height":252.8075471698113,"typeName":"disc","width":175.7320754716981}	{"angle":102.66999999999997,"centerX":254.2740041704426,"centerY":793.7224583722882,"height":132.56981132075472,"typeName":"cup","width":123.32075471698114}
user2	0766.jpg	{"angle":90.0,"centerX":260.682679245283,"centerY":801.5849056603773,"height":265.13962264150945,"typeName":"disc","width":172.6490566037736}	{"angle":81.51999999999998,"centerX":258.3805420864335,"centerY":784.8173247806006,"height":95.57358490566037,"typeName":"cup","width":83.24150943396226}
user3	0766.jpg	{"angle":90.0,"centerX":265.80049056603775,"centerY":800.0433962264151,"height":255.89056603773582,"typeName":"disc","width":188.0641509433962}	{"angle":90.0,"centerX":253.16011320754728,"centerY":790.7943396226415,"height":101.73962264150944,"typeName":"cup","width":101.73962264150944}
user4	0766.jpg	{"angle":90.0,"centerX":258.0929433962265,"centerY":804.051320754717,"height":243.55849056603773,"typeName":"disc","width":160.31698113207545}	{"angle":90.0,"centerX":266.75622641509426,"centerY":794.8022641509434,"height":80.15849056603773,"typeName":"cup","width":80.15849056603773}
user5	0766.jpg	{"angle":90.0,"centerX":263.02577358490566,"centerY":799.8275849056604,"height":243.55849056603773,"typeName":"disc","width":178.81509433962262}	{"angle":90.0,"centerX":259.29532075471684,"centerY":779.9729433962265,"height":86.3245283018868,"typeName":"cup","width":70.90943396226415}
user6	0766.jpg	{"angle":101.32999999999993,"centerX":266.7915603613603,"centerY":783.124965697262,"height":237.3924528301887,"typeName":"disc","width":178.81509433962262}	{"angle":90.0,"centerX":266.1396226415095,"centerY":786.1698113207547,"height":98.6566037735849,"typeName":"cup","width":98.6566037735849}
user7	0766.jpg	{"angle":95.43000000000006,"centerX":258.0851117476129,"centerY":794.085628135917,"height":271.3056603773585,"typeName":"disc","width":166.48301886792453}	{"angle":74.71000000000012,"centerX":254.0985021469287,"centerY":779.0977407912111,"height":64.74339622641509,"typeName":"cup","width":46.24528301886792}
