# Supplementary material
Source: ML conference proceedings conference paper supplement (https://openreview.net/forum?id=IkDz6wxeTG)
Supplement: supplementary_material [file 0776.xlsx]

## Sheet: sheet1
7位医生原始标注椭圆参数
User	Image_Name	Disc	Cup
user1	0776.jpg	{"angle":90.0,"centerX":464.4085660377359,"centerY":823.1660377358489,"height":252.8075471698113,"typeName":"disc","width":221.97735849056605}	{"angle":90.0,"centerX":464.4085660377359,"centerY":826.2490566037736,"height":154.1509433962264,"typeName":"cup","width":141.8188679245283}
user2	0776.jpg	{"angle":78.11000000000001,"centerX":464.6597689465643,"centerY":829.034593840323,"height":286.7207547169811,"typeName":"disc","width":215.81132075471695}	{"angle":75.20000000000002,"centerX":474.10118838340463,"centerY":835.0566016579749,"height":104.82264150943396,"typeName":"cup","width":80.15849056603773}
user3	0776.jpg	{"angle":90.0,"centerX":473.6884528301887,"centerY":837.0396226415094,"height":292.8867924528302,"typeName":"disc","width":221.97735849056605}	{"angle":90.0,"centerX":490.2750943396227,"centerY":830.8735849056603,"height":157.23396226415093,"typeName":"cup","width":151.06792452830186}
user4	0776.jpg	{"angle":90.0,"centerX":464.65520754716977,"centerY":831.7984905660377,"height":258.97358490566035,"typeName":"disc","width":197.3132075471698}	{"angle":90.0,"centerX":490.2750943396227,"centerY":833.34,"height":123.32075471698114,"typeName":"cup","width":123.32075471698114}
user5	0776.jpg	{"angle":90.0,"centerX":470.0813207547169,"centerY":822.8269056603773,"height":237.3924528301887,"typeName":"disc","width":197.3132075471698}	{"angle":90.0,"centerX":470.79041509433955,"centerY":832.1992830188678,"height":95.57358490566037,"typeName":"cup","width":95.57358490566037}
user6	0776.jpg	{"angle":90.0,"centerX":466.53584905660387,"centerY":830.8735849056603,"height":249.72452830188678,"typeName":"disc","width":209.64528301886793}	{"angle":90.0,"centerX":486.57547169811323,"centerY":827.7905660377359,"height":132.56981132075472,"typeName":"cup","width":126.40377358490565}
user7	0776.jpg	{"angle":84.96000000000004,"centerX":469.54901027295523,"centerY":824.2657538654468,"height":258.97358490566035,"typeName":"disc","width":203.47924528301888}	{"angle":118.5100000000001,"centerX":478.8822475859579,"centerY":832.97583565024,"height":83.24150943396226,"typeName":"cup","width":89.40754716981131}
