# Supplementary material
Source: ML conference proceedings conference paper supplement (https://openreview.net/forum?id=IkDz6wxeTG)
Supplement: supplementary_material [file 0807.xlsx]

## Sheet: sheet1
7位医生原始标注椭圆参数
User	Image_Name	Disc	Cup
user1	0807.jpg	{"angle":90.0,"centerX":445.9104528301889,"centerY":744.5490566037735,"height":262.05660377358487,"typeName":"disc","width":228.1433962264151}	{"angle":90.0,"centerX":439.74441509433973,"centerY":742.730075471698,"height":181.89811320754714,"typeName":"cup","width":166.48301886792453}
user2	0807.jpg	{"angle":83.89999999999998,"centerX":443.6043028303827,"centerY":743.8568301054528,"height":268.2226415094339,"typeName":"disc","width":228.1433962264151}	{"angle":81.58000000000007,"centerX":456.0341202612424,"centerY":737.7363095012605,"height":147.98490566037734,"typeName":"cup","width":114.07169811320755}
user3	0807.jpg	{"angle":90.0,"centerX":444.95471698113215,"centerY":733.7584905660377,"height":271.3056603773585,"typeName":"disc","width":221.97735849056605}	{"angle":90.0,"centerX":447.11283018867925,"centerY":747.632075471698,"height":169.56603773584905,"typeName":"cup","width":154.1509433962264}
user4	0807.jpg	{"angle":90.0,"centerX":444.0298113207548,"centerY":742.3909433962264,"height":246.64150943396228,"typeName":"disc","width":200.39622641509433}	{"angle":90.0,"centerX":437.86377358490563,"centerY":743.9324528301887,"height":135.65283018867925,"typeName":"cup","width":135.65283018867925}
user5	0807.jpg	{"angle":90.0,"centerX":441.00845283018884,"centerY":729.0414716981132,"height":243.55849056603773,"typeName":"disc","width":206.56226415094338}	{"angle":90.0,"centerX":448.5310188679248,"centerY":730.8296226415093,"height":138.73584905660377,"typeName":"cup","width":117.15471698113207}
user6	0807.jpg	{"angle":90.0,"centerX":443.4132075471698,"centerY":739.9245283018868,"height":246.64150943396228,"typeName":"disc","width":212.72830188679245}	{"angle":90.0,"centerX":446.49622641509427,"centerY":733.7584905660376,"height":160.31698113207545,"typeName":"cup","width":138.73584905660377}
user7	0807.jpg	{"angle":90.0,"centerX":444.58475471698125,"centerY":733.1727169811321,"height":265.13962264150945,"typeName":"disc","width":234.30943396226414}	{"angle":80.21000000000002,"centerX":453.012953720664,"centerY":732.3383040287606,"height":123.32075471698114,"typeName":"cup","width":98.6566037735849}
